# Supplementary material
Source: publisher site journal article supplement (http://kjim.org/upload/media/kjim-2020-243-suppl.pdf)
Supplement: Supplementary file 1 [file kjim-2020-243-suppl.pdf]

**Supplementary Table 1. Characteristic of the recurrent patient in the stage I gastric cancer patients**

| Characteristic                     | Case 1                                            | Case 2                                        | Case 3                                      |
|------------------------------------|---------------------------------------------------|-----------------------------------------------|---------------------------------------------|
| Age, yr                            | 56                                                | 56                                            | 69                                          |
| Sex                                | Male                                              | Male                                          | Male                                        |
| Body mass index, kg/m <sup>2</sup> | 26.5                                              | 23.8                                          | 23.8                                        |
| Current smoking                    | Non-smoker                                        | Smoker                                        | Non-smoker                                  |
| Alcohol drinking                   | Social drinking                                   | None                                          | None                                        |
| CEA                                | 1.15                                              | 1.55                                          | 9.66                                        |
| CA19-9                             | 0                                                 | 197.2                                         | 14.3                                        |
| Depth                              | SM <sub>3</sub>                                   | SM                                            | SM <sub>1</sub>                             |
| Tumor size, cm                     | 6                                                 | 4.5                                           | 1.5                                         |
| Lymphatic invasion                 | Positive                                          | Positive                                      | Negative                                    |
| Vascular invasion                  | Positive                                          | Positive                                      | Negative                                    |
| Stage, 7th AJCC                    | IB                                                | IB                                            | IA                                          |
| Location                           | Low 1/3                                           | Low 1/3                                       | Low 1/3                                     |
| Histologic subtype                 | Tubular adenocarcinoma, moderately differentiated | Tubular adenocarcinoma, poorly differentiated | Tubular adenocarcinoma, well differentiated |
| Lauren's classification            |                                                   |                                               |                                             |
| p53                                | Positive                                          | Positive                                      | Positive                                    |
| EGFR                               | Negative                                          | Positive                                      | Positive                                    |
| HER-2                              | Positive                                          | 0                                             | Positive                                    |
| E-cadherin                         | Positive                                          | Positive                                      | Positive                                    |
| Ki67 level                         | 90                                                | 90                                            | 60                                          |
| Surgical treatment                 | Distal subtotal gastrectomy                       | Distal subtotal gastrectomy                   | Distal subtotal gastrectomy                 |

CEA, carcinoembryonic antigen; CA19-9, carbohydrate antigen 19-9; SM, submucosa; AJCC, American Joint Committee on Cancer; EGFR, epidermal growth factor receptor; HER-2, human epidermal growth factor receptor 2.
